# Supplementary material
Source: PubMed Central journal article supplement (PMC6317859)
Supplement: NIHMS990560-supplement-Supp_info.pdf [file NIHMS990560-supplement-Supp_info.pdf]

# **Supplementary Materials for "Evaluating Classification Performance of Biomarkers in Two-Phase Case-Control Studies"**

Lu Wang<sup>1</sup>, Ying Huang<sup>\*1,2</sup>

<sup>1</sup> *Vaccine and Infectious Disease Division, Fred Hutchinson Cancer Research Center, Seattle, WA 98109, U.S.A.*

<sup>2</sup> *Department of Biostatistics, University of Washington, Seattle, WA 98195, U.S.A.*

*\* yhuang@fhcrc.org*

## Appendix A. Proof of Theorem 1

Suppose we model the sampling probabilities  $p_D$  and  $p_{\bar{D}}$  with finite-dimensional parameters  $\theta_D$  and  $\theta_{\bar{D}}$ , respectively. Let  $\hat{\theta}_D$  and  $\hat{\theta}_{\bar{D}}$  be the maximum likelihood estimators and  $\hat{p}_D$  and  $\hat{p}_{\bar{D}}$  be the corresponding sampling probabilities estimators. To prove Theorem 1, we first show the asymptotic properties of the IPW sensitivity estimator  $\widehat{SEN}_{IPW}(c, \hat{p}_D) = \frac{\sum_{i=1}^{N_D} \frac{\delta_{Di}}{\hat{p}_{Di}} I(X_{Di} > c)}{\sum_{i=1}^{N_D} \frac{\delta_{Di}}{\hat{p}_{Di}}}$  and the IPW specificity estimator  $\widehat{SPE}_{IPW}(c, \hat{p}_{\bar{D}}) = \frac{\sum_{j=1}^{N_{\bar{D}}} \frac{\delta_{\bar{D}j}}{\hat{p}_{\bar{D}j}} I(X_{\bar{D}j} < c)}{\sum_{j=1}^{N_{\bar{D}}} \frac{\delta_{\bar{D}j}}{\hat{p}_{\bar{D}j}}}$ , where  $\hat{p}_D$  and  $\hat{p}_{\bar{D}}$  are obtained from the GLM model. The following lemma presents the results.

**Lemma A.1** *Assume  $0 < p_D, p_{\bar{D}} \leq 1$  and  $N_D/N \rightarrow \lambda$  as the sample size  $N \rightarrow \infty$ . Then as  $N \rightarrow \infty$ ,  $\sqrt{N_D} [\widehat{SEN}_{IPW}(c, \hat{p}_D) - SEN(c)]$  converges to a normal random variable with mean 0 and variance  $\sigma_{D,IPW}^2(c)$ , and  $\sqrt{N_{\bar{D}}} [\widehat{SPE}_{IPW}(c, \hat{p}_{\bar{D}}) - SPE(c)]$  converges to a normal random variable with mean 0 and variance  $\sigma_{\bar{D},IPW}^2(c)$ , where*

$$\begin{aligned} \sigma_{d,IPW}^2(c) &= \text{Var}(H_d) + E[(p_d^{-1} - 1)H_d] - SS_d(c) \{E[(p_d^{-1} - 1)H_d] + \text{Cov}(p_d^{-1} - 1, H_d)\} \\ &\quad - [SS_d(c) \times a_d - b_d(c)]^T I_d^{-1} [SS_d(c) \times a_d - b_d(c)], \text{ for } d = D, \bar{D} \end{aligned}$$

in which  $H_D = I(X_D > c)$ ,  $H_{\bar{D}} = I(X_{\bar{D}} < c)$ ,  $SS_D(c) = SEN(c)$ ,  $SS_{\bar{D}}(c) = SPE(c)$ ,

$a_d = E[(1/p_d)(\partial p_d / \partial \theta_d)]$ ,  $b_d(c) = E[H_d(1/p_d)(\partial p_d / \partial \theta_d)]$ ,  $I_d = E\left[\left(\frac{1}{p_d} + \frac{1}{1-p_d}\right) \frac{\partial p_d}{\partial \theta_d} \frac{\partial p_d}{\partial \theta_d}\right]$  is the information matrix of  $\theta_d$ , for  $d = D, \bar{D}$ .

**Proof.** To begin with, we define  $\widehat{SEN}_{IPW}(c, \hat{p}_D) = \left[\sum_{i=1}^{N_D} \frac{\delta_{Di}}{\hat{p}_{Di}} I(X_{Di} > c)\right] / N_D$  and show its asymptotic normality. In the following proof, we omit the subscript  $D$  for simplicity. First, we observe that

$$\begin{aligned} &\sqrt{N_D} [\widehat{SEN}_{IPW}(c, \hat{p}) - SEN(c)] \\ &= \sqrt{N_D} [\widehat{SEN}_{IPW}(c, \hat{p}) - \widehat{SEN}_{IPW}(c, p)] + \sqrt{N_D} [\widehat{SEN}_{IPW}(c, p) - SEN(c)] \\ &= \sqrt{N_D} \frac{\partial E[\widehat{SEN}_{IPW}(c, p)]}{\partial \theta} (\hat{\theta} - \theta) + \sqrt{N_D} \left[ \frac{1}{N_D} \sum_{i=1}^{N_D} \frac{\delta_i}{p_i} I(X_i > c) - E[I(X > c)] \right] + o_p(1) \\ &= U + M + o_p(1), \end{aligned}$$

where

$$U = \sqrt{N_D} \frac{\partial E[\widehat{SEN}_{IPW}(c, p)]}{\partial \theta} (\hat{\theta} - \theta) = -\sqrt{N_D} E \left[ I(X > c) \frac{1}{p} \frac{\partial p}{\partial \theta} \right] (\hat{\theta} - \theta),$$

$$M = \sqrt{N_D} \left[ \frac{1}{N_D} \sum_{i=1}^{N_D} \frac{\delta_i}{p_i} I(X_i > c) - E[I(X > c)] \right].$$

Obviously,  $E(U) = E(M) = 0$ . So, by the central limit theorem (CLT),  $\sqrt{N_D} [\widehat{SEN}_{IPW}(c, \hat{p}_D) - SEN(c)]$  converges to a normal random variable with mean 0 and variance  $Var(U + M)$ , as  $N_D \rightarrow \infty$ .

Next, we define  $\beta = \frac{1}{N_D} \sum_{i=1}^{N_D} (\delta_i / \hat{p}_i)$ , then one has

$$\begin{aligned} & \sqrt{N_D} (\beta - 1) \\ &= \sqrt{N_D} \left\{ \frac{1}{N_D} \sum_{i=1}^{N_D} \frac{\delta_i}{\hat{p}_i} - \frac{1}{N_D} \sum_{i=1}^{N_D} \frac{\delta_i}{p_i} \right\} + \sqrt{N_D} \left( \frac{1}{N_D} \sum_{i=1}^{N_D} \frac{\delta_i}{p_i} - 1 \right) \\ &= -\sqrt{N_D} \frac{1}{N_D} E \left( \sum_{i=1}^{N_D} \frac{\delta_i}{p_i^2} \frac{\partial p}{\partial \theta} \right) (\hat{\theta} - \theta) + \sqrt{N_D} \left( \frac{1}{N_D} \sum_{i=1}^{N_D} \frac{\delta_i}{p_i} - 1 \right) + o_p(1) \\ &= C^* + E^* + o_p(1), \end{aligned}$$

where

$$C^* = -\sqrt{N_D} \frac{1}{N_D} E \left( \sum_{i=1}^{N_D} \frac{\delta_i}{p_i^2} \frac{\partial p}{\partial \theta} \right) (\hat{\theta} - \theta) = -\sqrt{N_D} E \left( \frac{1}{p} \frac{\partial p}{\partial \theta} \right) (\hat{\theta} - \theta),$$

$$E^* = \sqrt{N_D} \left( \frac{1}{N_D} \sum_{i=1}^{N_D} \frac{\delta_i}{p_i} - 1 \right).$$

Therefore, by CLT,  $\sqrt{N_D} (\beta - 1)$  converges to a normal random variable with mean 0 and variance  $Var(C^* + E^*)$ , as  $N_D \rightarrow \infty$ . Then  $\sqrt{N_D} \begin{pmatrix} \widehat{SEN}_{IPW}(c, \hat{p}) - SEN(c) \\ \beta - 1 \end{pmatrix}$  converges to the bivariate

normal random variable with mean  $\begin{pmatrix} 0 \\ 0 \end{pmatrix}$  and covariance matrix

$\begin{bmatrix} Var(U + M) & Cov(U + M, C^* + E^*) \\ Cov(U + M, C^* + E^*) & Var(C^* + E^*) \end{bmatrix}$ . With the fact that  $\widehat{SEN}_{IPW}(c, \hat{p}) = \widehat{SEN}_{IPW}(c, \hat{p}) / \beta$ , by Delta method, as  $N_D \rightarrow \infty$ ,  $\sqrt{N_D} [\widehat{SEN}_{IPW}(c, \hat{p}) - SEN(c)]$  converges to a normal random variable with mean 0 and variance

$$\begin{aligned} & \sigma_{D,IPW}^2(c) \\ &= \begin{pmatrix} 1 & -SEN(c) \end{pmatrix} \begin{bmatrix} Var(U + M) & Cov(U + M, C^* + E^*) \\ Cov(U + M, C^* + E^*) & Var(C^* + E^*) \end{bmatrix} \begin{pmatrix} 1 \\ -SEN(c) \end{pmatrix} \end{aligned}$$

$$\begin{aligned}
&= \text{Var}(U) + \text{Var}(M) + 2\text{Cov}(U + M) \\
&\quad - 2\text{SEN}(c) \times [\text{Cov}(U, C^*) + \text{Cov}(U, E^*) + \text{Cov}(M, C^*) + \text{Cov}(M, E^*)] \\
&\quad + \text{SEN}^2(c) \times [\text{Var}(C^*) + \text{Var}(E^*) + 2\text{Cov}(C^* + E^*)] \\
&= I_1 + I_2, \tag{A.1}
\end{aligned}$$

where

$$\begin{aligned}
I_1 &= \text{Var}(M) - 2\text{SEN}(c) \times \text{Cov}(M, E^*) + \text{SEN}^2(c) \times \text{Var}(E^*), \\
I_2 &= \text{Var}(U) + 2\text{Cov}(U + M) - 2\text{SEN}(c) \times [\text{Cov}(U, C^*) + \text{Cov}(U, E^*) + \text{Cov}(M, C^*)] \\
&\quad + \text{SEN}^2(c) \times [\text{Var}(C^*) + 2\text{Cov}(C^* + E^*)].
\end{aligned}$$

We notice that

$$\begin{aligned}
\text{Var}(M) &= \text{Var}\left[\frac{\delta}{p}I(X > c)\right] = E\left[\left(\frac{1}{p} - 1\right)I(X > c)\right] + \text{Var}[I(X > c)], \\
\text{Var}(E^*) &= \text{Var}\left(\frac{\delta}{p}\right) = E\left(\frac{1}{p} - 1\right), \\
\text{Cov}(M, E^*) &= \text{Cov}\left[\frac{\delta}{p}I(X > c), \frac{\delta}{p}\right] = E\left[\left(\frac{1}{p} - 1\right)I(X > c)\right].
\end{aligned}$$

Therefore,

$$\begin{aligned}
I_1 &= E\left[\left(\frac{1}{p} - 1\right)I(X > c)\right] + \text{Var}[I(X > c)] \\
&\quad - \text{SEN}(c) \times \left\{2E\left[\left(\frac{1}{p} - 1\right)I(X > c)\right] - \text{SEN}(c) \times E\left(\frac{1}{p} - 1\right)\right\} \\
&= E\left[\left(\frac{1}{p} - 1\right)I(X > c)\right] + \text{Var}[I(X > c)] \\
&\quad - \text{SEN}(c) \times \left\{2E\left[\left(\frac{1}{p} - 1\right)I(X > c)\right] - E[I(X > c)]E\left(\frac{1}{p} - 1\right)\right\} \\
&= E\left[\left(\frac{1}{p} - 1\right)I(X > c)\right] + \text{Var}[I(X > c)] \\
&\quad - \text{SEN}(c) \times \left\{E\left[\left(\frac{1}{p} - 1\right)I(X > c)\right] + \text{Cov}\left(\frac{1}{p} - 1, I(X > c)\right)\right\}. \tag{A.2}
\end{aligned}$$

Next, let  $a_D = E[(1/p)(\partial p/\partial \theta)]$  and  $b_D(c) = E[I(X > c)(1/p)(\partial p/\partial \theta)]$ , then

$$\begin{aligned}
\text{Var}(U) &= E\left[I(X > c)\frac{1}{p}\frac{\partial p}{\partial \theta}\right]^T I_D^{-1} E\left[I(X > c)\frac{1}{p}\frac{\partial p}{\partial \theta}\right] = b_D^T(c) I_D^{-1} b_D(c), \\
\text{Var}(C^*) &= E\left(\frac{1}{p}\frac{\partial p}{\partial \theta}\right)^T I_D^{-1} E\left(\frac{1}{p}\frac{\partial p}{\partial \theta}\right) = a_D^T I_D^{-1} a_D,
\end{aligned}$$

$$\begin{aligned}
& \text{Cov}(U, M) \\
&= -\text{Cov}\left(E\left[I(X > c) \frac{1}{p} \frac{\partial p}{\partial \theta}\right] I_D^{-1} \left[\left(\frac{\delta}{p} + \frac{1-\delta}{1-p}\right) \frac{\partial p}{\partial \theta}\right], \frac{\delta}{p} I(X > c)\right) \\
&= -E\left[I(X > c) \frac{1}{p} \frac{\partial p}{\partial \theta}\right]^T I_D^{-1} E\left[I(X > c) \frac{1}{p} \frac{\partial p}{\partial \theta}\right] \\
&= -b_D^T(c) I_D^{-1} b_D(c),
\end{aligned}$$

where  $I_D$  is the information matrix for  $\theta_D$ . Similarly, we can show that  $\text{Cov}(U, C^*) = b_D^T(c) I_D^{-1} a_D$ ,  $\text{Cov}(U, E^*) = \text{Cov}(M, C^*) = -b_D^T(c) I_D^{-1} a_D$ ,  $\text{Cov}(C^*, E^*) = -a_D^T I_D^{-1} a_D$ . So

$$\begin{aligned}
I_2 &= b_D^T(c) I_D^{-1} b_D(c) - 2b_D^T(c) I_D^{-1} b_D(c) - 2\text{SEN}(c) \times (b_D^T(c) I_D^{-1} a_D - 2b_D^T(c) I_D^{-1} a_D) \\
&\quad + \text{SEN}^2(c) \times (a_D^T I_D^{-1} a_D - 2a_D^T I_D^{-1} a_D) \\
&= -b_D^T(c) I_D^{-1} b_D(c) + 2\text{SEN}(c) \times b_D^T(c) I_D^{-1} a_D - \text{SEN}^2(c) \times a_D^T I_D^{-1} a_D \\
&= -[\text{SEN}(c) \times a_D - b_D(c)]^T I_D^{-1} [\text{SEN}(c) \times a_D - b_D(c)]. \tag{A.3}
\end{aligned}$$

Finally, the asymptotic variance of  $\widehat{\text{SEN}}_{IPW}(c, \hat{p}_D)$  can be obtained from equations (A.1), (A.2) and (A.3). Similar arguments can be used to prove the asymptotic variance of  $\widehat{\text{SPE}}_{IPW}(c, \hat{p}_D)$ . ■

We now show the asymptotic property of  $\sqrt{N_D} [\widehat{\text{ROC}}_{IPW}(t) - \text{ROC}(t)]$ . Observe that

$$\begin{aligned}
& \sqrt{N_D} [\widehat{\text{ROC}}_{IPW}(t) - \text{ROC}(t)] \\
&= \sqrt{N_D} \left\{ 1 - \hat{F}_{D,IPW} \left[ \hat{F}_{D,IPW}^{-1}(1-t) \right] - \left[ 1 - F_D \left[ F_D^{-1}(1-t) \right] \right] \right\} \\
&= \sqrt{N_D} \left\{ 1 - \hat{F}_{D,IPW} \left[ \hat{F}_{D,IPW}^{-1}(1-t) \right] - \left[ 1 - F_D \left[ \hat{F}_{D,IPW}^{-1}(1-t) \right] \right] \right\} \\
&\quad + \sqrt{N_D} \left\{ 1 - F_D \left[ \hat{F}_{D,IPW}^{-1}(1-t) \right] - \left[ 1 - F_D \left[ F_D^{-1}(1-t) \right] \right] \right\}. \tag{A.4}
\end{aligned}$$

Let  $c = F_D^{-1}(1-t)$ , then according to Lemme A.1, as  $N \rightarrow \infty$

$$\sqrt{N_D} \left\{ 1 - \hat{F}_{D,IPW}(c) - \left[ 1 - F_{D,IPW}(c) \right] \right\} \xrightarrow{d} N\left(0, \sigma_{D,IPW}^2(c)\right),$$

and

$$\sqrt{N_D} \left( \hat{F}_{D,IPW}(c) - F_D(c) \right) \xrightarrow{d} N\left(0, \sigma_{D,IPW}^2(c)\right). \tag{A.5}$$

Therefore, we have

$$\begin{aligned}
& \sqrt{N_D} \left\{ 1 - \hat{F}_{D,IPW} \left[ \hat{F}_{D,IPW}^{-1}(1-t) \right] - \left[ 1 - F_{D,IPW} \left[ \hat{F}_{D,IPW}^{-1}(1-t) \right] \right] \right\} \\
&= \sqrt{N_D} \left\{ 1 - \hat{F}_{D,IPW} \left[ \hat{F}_{D,IPW}^{-1}(1-t) \right] - \left[ 1 - F_{D,IPW} \left[ \hat{F}_{D,IPW}^{-1}(1-t) \right] \right] \right\}
\end{aligned}$$

$$\begin{aligned}
& -\sqrt{N_D} \left\{ 1 - \hat{F}_{D,IPW} \left[ F_{\bar{D},IPW}^{-1} (1-t) \right] - \left[ 1 - F_{D,IPW} \left[ F_{\bar{D},IPW}^{-1} (1-t) \right] \right] \right\} \\
& + \sqrt{N_D} \left\{ 1 - \hat{F}_{D,IPW} \left[ F_{\bar{D},IPW}^{-1} (1-t) \right] - \left[ 1 - F_{D,IPW} \left[ F_{\bar{D},IPW}^{-1} (1-t) \right] \right] \right\} \\
= & \sqrt{N_D} \left\{ 1 - \hat{F}_{D,IPW} (c) - \left[ 1 - F_{D,IPW} (c) \right] \right\} + o_p(1) \xrightarrow{d} N \left( 0, \sigma_{D,IPW}^2 (c) \right). \tag{A.6}
\end{aligned}$$

Furthermore, by the property of stochastic equicontinuity, the result shown in (A.5) is not affected if  $F_{\bar{D}}^{-1} (1-t)$  is replaced by a consistent estimator  $\hat{F}_{\bar{D},IPW}^{-1} (1-t)$ , thus

$$\sqrt{N_{\bar{D}}} \left[ \hat{F}_{\bar{D},IPW} \left( \hat{F}_{\bar{D},IPW}^{-1} (1-t) \right) - F_{\bar{D}} \left( \hat{F}_{\bar{D},IPW}^{-1} (1-t) \right) \right] \xrightarrow{d} N \left( 0, \sigma_{\bar{D},IPW}^2 (c) \right),$$

which implies that

$$\sqrt{N_{\bar{D}}} \left[ F_{\bar{D}} \left( \hat{F}_{\bar{D},IPW}^{-1} (1-t) \right) - (1-t) \right] \xrightarrow{d} N \left( 0, \sigma_{\bar{D},IPW}^2 (c) \right).$$

Then using the Delta method via the transformation  $F_{\bar{D}}^{-1}$ , we have

$$\sqrt{N_{\bar{D}}} \left[ \hat{F}_{\bar{D},IPW}^{-1} (1-t) - F_{\bar{D}}^{-1} (1-t) \right] \xrightarrow{d} N \left( 0, \frac{\sigma_{\bar{D},IPW}^2 (c)}{f_{\bar{D}}^2 (c)} \right).$$

Next, consider the transformation  $g(u) = 1 - F_D(u)$ . We apply Delta method and obtain

$$\sqrt{N_D} \left\{ 1 - F_D \left[ \hat{F}_{\bar{D},IPW}^{-1} (1-t) \right] - \left[ 1 - F_D \left[ F_{\bar{D}}^{-1} (1-t) \right] \right] \right\} \xrightarrow{d} N \left( 0, \frac{f_D^2 (c)}{f_{\bar{D}}^2 (c)} \sigma_{\bar{D},IPW}^2 (c) \right).$$

Therefore, as  $N_D/N \rightarrow \lambda$  and  $N \rightarrow \infty$ ,

$$\sqrt{N_D} \left\{ 1 - F_D \left[ \hat{F}_{\bar{D},IPW}^{-1} (1-t) \right] - \left[ 1 - F_D \left[ F_{\bar{D}}^{-1} (1-t) \right] \right] \right\} \xrightarrow{d} N \left( 0, \frac{\lambda}{1-\lambda} \frac{f_D^2 (c)}{f_{\bar{D}}^2 (c)} \sigma_{\bar{D},IPW}^2 (c) \right). \tag{A.7}$$

Followed by equations (A.4), (A.6) and (A.7), the proof of Theorem 1 is complete.

## Appendix B. Improvement on efficiency via including auxiliary variables

We now show that the efficiency of our proposed IPW estimators can be improved by including more auxiliary variables than sampling strata in estimating the sampling probabilities. Here, we take the IPW AUC estimator as an example. Similar arguments can be used for the IPW ROC(t)

and partial AUC estimators. Here we consider the following two models in estimating sampling probabilities.

Model A:

$$\begin{aligned}\log\left(\frac{p_D}{1-p_D}\right) &= \theta_{D0} + \theta_{D1}^T V_D, \\ \log\left(\frac{p_{\bar{D}}}{1-p_{\bar{D}}}\right) &= \theta_{\bar{D}0} + \theta_{\bar{D}1}^T V_{\bar{D}}.\end{aligned}$$

Model B:

$$\begin{aligned}\log\left(\frac{p_D}{1-p_D}\right) &= \theta_{D0} + \theta_{D1}^T V_D + \theta_{D2} Z_D, \\ \log\left(\frac{p_{\bar{D}}}{1-p_{\bar{D}}}\right) &= \theta_{\bar{D}0} + \theta_{\bar{D}1}^T V_{\bar{D}} + \theta_{\bar{D}2} Z_{\bar{D}}.\end{aligned}$$

In model A, we only include the dummy variable  $V$  for sampling strata to estimate the sampling probabilities. In model B, we add an auxiliary variable  $Z$  besides sampling strata. We need to show that

$$\begin{aligned}& \frac{1}{\lambda} (AUC \times a_{D_B} - l_{D_B})^T I_{D_B}^{-1} (AUC \times a_{D_B} - l_{D_B}) + \\ & \frac{1}{1-\lambda} (AUC \times a_{\bar{D}_B} - l_{\bar{D}_B})^T I_{\bar{D}_B}^{-1} (AUC \times a_{\bar{D}_B} - l_{\bar{D}_B}) \\ \geq & \frac{1}{\lambda} (AUC \times a_{D_A} - l_{D_A})^T I_{D_A}^{-1} (AUC \times a_{D_A} - l_{D_A}) \\ & + \frac{1}{1-\lambda} (AUC \times a_{\bar{D}_A} - l_{\bar{D}_A})^T I_{\bar{D}_A}^{-1} (AUC \times a_{\bar{D}_A} - l_{\bar{D}_A}),\end{aligned}\tag{A.8}$$

where  $l_D$ ,  $l_{\bar{D}}$ ,  $a_D$ ,  $a_{\bar{D}}$ ,  $I_D$  and  $I_{\bar{D}}$  are defined as aforementioned. We use subscripts  $A$  and  $B$  to denote the corresponding values obtained from model A and B, respectively. With the fact that  $I_{D_B} = \begin{bmatrix} I_{D_A} & e_D \\ e_D^T & g_D \end{bmatrix}$ ,  $a_{D_B} = \begin{bmatrix} a_{D_A} \\ m_D \end{bmatrix}$ , and  $l_{D_B} = \begin{bmatrix} l_{D_A} \\ u_D \end{bmatrix}$ , where  $e_D = E\left[\left(\frac{1}{p_D} + \frac{1}{1-p_D}\right) \frac{\partial p_D}{\partial \theta_{D(-2)}} \frac{\partial p_D}{\partial \theta_{D2}}\right]$ ,  $g_D = E\left[\left(\frac{1}{p_D} + \frac{1}{1-p_D}\right) \frac{\partial p_D}{\partial \theta_{D2}} \frac{\partial p_D}{\partial \theta_{D2}}\right]$ ,  $m_D = E[(1/p_D)(\partial p_D/\partial \theta_{D2})]$ ,  $u_D = E[I(X_D > X_{\bar{D}})(1/p_D)(\partial p_D/\partial \theta_{D2})]$ , in which  $\theta_{D(-2)} = (\theta_{D0}, \theta_{D1}^T)^T$ . Then we have

$$\begin{aligned}& (AUC \times a_{D_B} - l_{D_B})^T I_{D_B}^{-1} (AUC \times a_{D_B} - l_{D_B}) \\ = & \begin{bmatrix} (AUC \times a_{D_A} - l_{D_A})^T & AUC \times m_D - u_D \end{bmatrix} I_{D_B}^{-1} \begin{bmatrix} (AUC \times a_{D_A} - l_{D_A})^T \\ AUC \times m_D - u_D \end{bmatrix} \\ = & (AUC \times a_{D_A} - l_{D_A})^T I_{D_A}^{-1} (AUC \times a_{D_A} - l_{D_A}) + \begin{bmatrix} (AUC \times a_{D_A} - l_{D_A})^T & AUC \times m_D - u_D \end{bmatrix} \\ & \times \begin{bmatrix} I_{D_A}^{-1} e_D (g_D - e_D^T I_{D_A}^{-1} e_D)^{-1} e_D^T I_{D_A}^{-1} & -(g_D - e_D^T I_{D_A}^{-1} e_D)^{-1} I_{D_A}^{-1} e_D \\ (g_D - e_D^T I_{D_A}^{-1} e_D)^{-1} e_D^T I_{D_A}^{-1} & (g_D - e_D^T I_{D_A}^{-1} e_D)^{-1} \end{bmatrix}\end{aligned}$$

$$\begin{aligned}
& \times \begin{bmatrix} (AUC \times a_{D_A} - l_{D_A})^T \\ AUC \times m_D - u_D \end{bmatrix} \\
= & (AUC \times a_{D_A} - l_{D_A})^T I_{D_A}^{-1} (AUC \times a_{D_A} - l_{D_A}) \\
& + \begin{bmatrix} (AUC \times a_{D_A} - l_{D_A})^T & AUC \times m_D - u_D \end{bmatrix} \times \begin{bmatrix} I_{D_A}^{-1} e_D (g_D - e_D^T I_{D_A}^{-1} e_D)^{-1/2} \\ -(g_D - e_D^T I_{D_A}^{-1} e_D)^{-1/2} \end{bmatrix} \\
& \times \begin{bmatrix} (g_D - e_D^T I_{D_A}^{-1} e_D)^{-1/2} & e_D^T I_{D_A}^{-1} \\ -(g_D - e_D^T I_{D_A}^{-1} e_D)^{-1/2} \end{bmatrix} \times \begin{bmatrix} (AUC \times a_{D_A} - l_{D_A})^T \\ AUC \times m_D - u_D \end{bmatrix} \\
= & (AUC \times a_{D_A} - l_{D_A})^T I_{D_A}^{-1} (AUC \times a_{D_A} - l_{D_A}) + \\
& \left[ (AUC \times a_{D_A} - l_{D_A})^T I_{D_A}^{-1} e_D (g_D - e_D^T I_{D_A}^{-1} e_D)^{-1/2} - (AUC \times m_D - u_D) (g_D - e_D^T I_{D_A}^{-1} e_D)^{-1/2} \right]^2 \\
\geq & (AUC \times a_{D_A} - l_{D_A})^T I_{D_A}^{-1} (AUC \times a_{D_A} - l_{D_A}).
\end{aligned}$$

Similarly, for the controls, one has

$$(AUC \times a_{\bar{D}_B} - l_{\bar{D}_B})^T I_{\bar{D}_B}^{-1} (AUC \times a_{\bar{D}_B} - l_{\bar{D}_B}) \geq (AUC \times a_{\bar{D}_A} - l_{\bar{D}_A})^T I_{\bar{D}_A}^{-1} (AUC \times a_{\bar{D}_A} - l_{\bar{D}_A}).$$

Therefore, the inequation (A.8) is hold. Note the equality holds when

$$(AUC \times a_{D_A} - l_{D_A})^T I_{D_A}^{-1} e_D = (AUC \times m_D - u_D) \text{ and } (AUC \times a_{\bar{D}_A} - l_{\bar{D}_A})^T I_{\bar{D}_A}^{-1} e_{\bar{D}} = (AUC \times m_{\bar{D}} - u_{\bar{D}}), \quad (\text{A.9})$$

otherwise the efficiency would always be improved when the auxiliary variables are added in the model.

## Appendix C. Proof of Theorem 3

For simplicity, we represent  $\widehat{pAUC}_{IPW}(t_0, t_1)$  and  $pAUC(t_0, t_1)$  as  $\widehat{pAUC}(\hat{p}, \hat{q})$  and  $pAUC$ , respectively. We note that

$$\begin{aligned}
& \sqrt{N} \left[ \widehat{pAUC}(\hat{p}, \hat{q}) - pAUC \right] \\
= & \sqrt{N} \left[ \widehat{pAUC}(\hat{p}, \hat{q}) - \widehat{pAUC}(\hat{p}, q) \right] + \sqrt{N} \left[ \widehat{pAUC}(\hat{p}, q) - pAUC \right] \\
= & I + II.
\end{aligned} \quad (\text{A.10})$$

Since  $\sqrt{N} [\hat{F}_D(u) - F_D(u)]$  and  $\sqrt{N} [\hat{F}_{\bar{D}}(u) - F_{\bar{D}}(u)]$  converges to a Gaussian process, using Clivenko-Cantelli theorem,  $\sup_x |\hat{F}_D(u) - F_D(u)| \rightarrow 0$  and  $\sup_x |\hat{F}_{\bar{D}}(u) - F_{\bar{D}}(u)| \rightarrow 0$  a.s. For the first term  $I$  in



(A.10), we have

$$\begin{aligned}
I &= \sqrt{N} \left[ \widehat{pAUC}(\hat{p}, \hat{q}) - \widehat{pAUC}(\hat{p}, q) \right] \\
&= \sqrt{N} \left[ \int_{\hat{q}_1}^{\hat{q}_0} (1 - \hat{F}_D(u)) d\hat{F}_D(u) - \int_{q_1}^{q_0} (1 - \hat{F}_D(u)) d\hat{F}_D(u) \right] \\
&= \sqrt{N} \left[ \int_{\hat{q}_1}^{\hat{q}_0} (1 - F_D(u)) d\hat{F}_D(u) - \int_{q_1}^{q_0} (1 - F_D(u)) d\hat{F}_D(u) \right] + o_p(1) \\
&= \sqrt{N} \left[ \int_{\hat{q}_1}^{\hat{q}_0} (1 - F_D(u)) d(F_{\bar{D}}(u)) - \int_{q_1}^{q_0} (1 - F_D(u)) d(F_{\bar{D}}(u)) \right] \\
&\quad + \sqrt{N} \left[ \int_{\hat{q}_1}^{\hat{q}_0} (1 - F_D(u)) d(\hat{F}_{\bar{D}}(u) - F_{\bar{D}}(u)) - \int_{q_1}^{q_0} (1 - F_D(u)) d(\hat{F}_{\bar{D}}(u) - F_{\bar{D}}(u)) \right] \\
&= \sqrt{N} \left[ \int_{\hat{q}_1}^{\hat{q}_0} (1 - F_D(u)) d(F_{\bar{D}}(u)) - \int_{q_1}^{q_0} (1 - F_D(u)) d(F_{\bar{D}}(u)) \right] + o_p(1) \\
&= \sqrt{N} \left[ \int_{\hat{q}_1}^{\hat{q}_0} (1 - F_D(u)) f_{\bar{D}}(u) d(u) - \int_{q_1}^{q_0} (1 - F_D(u)) f_{\bar{D}}(u) d(u) \right] \\
&\quad + \sqrt{N} \left[ \int_{q_1}^{\hat{q}_0} (1 - F_D(u)) f_{\bar{D}}(u) d(u) - \int_{q_1}^{q_0} (1 - F_D(u)) f_{\bar{D}}(u) d(u) \right] + o_p(1) \\
&= \sqrt{N} \int_{\hat{q}_1}^{q_1} (1 - F_D(u)) f_{\bar{D}}(u) d(u) + \sqrt{N} \int_{q_0}^{\hat{q}_0} (1 - F_D(u)) f_{\bar{D}}(u) d(u) + o_p(1) \\
&= -\sqrt{N} (1 - F_D(q_1)) f_{\bar{D}}(q_1) (\hat{q}_1 - q_1) + \sqrt{N} (1 - F_D(q_0)) f_{\bar{D}}(q_0) (\hat{q}_0 - q_0) + o_p(1).
\end{aligned}$$

Using the Bahadur representation,

$$\hat{q}_k - q_k = -\frac{1}{f_{\bar{D}}(q_k)} \left[ \hat{F}_{IPW, \bar{D}}(q_k) - (1 - t_k) \right] + o_p(1/\sqrt{N_{\bar{D}}}).$$

Therefore,

$$\begin{aligned}
I &\approx (1 - F_D(q_1)) \sqrt{N} \left[ \hat{F}_{IPW, \bar{D}}(q_1) - (1 - t_1) \right] - (1 - F_D(q_0)) \sqrt{N} \left[ \hat{F}_{IPW, \bar{D}}(q_0) - (1 - t_0) \right] \\
&= (1 - F_D(q_1)) \sqrt{N} \left[ \hat{F}_{IPW, \bar{D}}(q_1) - F_{\bar{D}}(q_1) \right] - (1 - F_D(q_0)) \sqrt{N} \left[ \hat{F}_{IPW, \bar{D}}(q_0) - F_{\bar{D}}(q_0) \right]
\end{aligned}$$

In addition, according to the proof of Lemma A.1, we have

$$\begin{aligned}
\sqrt{N_{\bar{D}}} \left[ \tilde{F}_{IPW, \bar{D}}(c) - F_{\bar{D}}(c) \right] &= \tilde{U}(c) + \tilde{M}(c) + o_p(1), \\
\sqrt{N_{\bar{D}}} [\beta - 1] &= \sqrt{N_{\bar{D}}} \left[ \sum_{j=1}^{N_D} (\delta_{Dj} / \hat{p}_{Dj}) / N_{\bar{D}} - 1 \right] = \tilde{E}^* + \tilde{C}^* + o_p(1)
\end{aligned}$$

where

$$\begin{aligned}
\tilde{U}(c) &= -\sqrt{N_{\bar{D}}}E\left[I(X_{\bar{D}} < c)\frac{1}{p_{\bar{D}}}\frac{\partial p_{\bar{D}}}{\partial \theta_{\bar{D}}}\right](\hat{\theta}_{\bar{D}} - \theta_{\bar{D}}), \\
\tilde{M}(c) &= \sqrt{N_{\bar{D}}}\left[\frac{1}{N_{\bar{D}}}\sum_{j=1}^{N_{\bar{D}}}\frac{\delta_{\bar{D}j}}{p_{\bar{D}j}}I(X_{\bar{D}j} < c) - E[I(X_{\bar{D}} < c)]\right], \\
\tilde{E}^* &= \sqrt{N_{\bar{D}}}\left(\sum_{j=1}^{N_{\bar{D}}}\frac{\delta_{\bar{D}j}}{p_{\bar{D}j}N_{\bar{D}}} - 1\right), \\
\tilde{C}^* &= -\sqrt{N_{\bar{D}}}E\left(\frac{1}{p_{\bar{D}}}\frac{\partial p_{\bar{D}}}{\partial \theta_{\bar{D}}}\right)(\hat{\theta}_{\bar{D}} - \theta_{\bar{D}}).
\end{aligned}$$

Then

$$\begin{aligned}
&\sqrt{N_{\bar{D}}}\left[\hat{F}_{IPW,\bar{D}}(c) - F_{\bar{D}}(c)\right] = \sqrt{N_{\bar{D}}}\left[\tilde{F}_{IPW,\bar{D}}(c)/\beta - F_{\bar{D}}(c)\right] \\
&= \sqrt{N_{\bar{D}}}\left[\tilde{F}_{IPW,\bar{D}}(c) - F_{\bar{D}}(c)\right] + \sqrt{N_{\bar{D}}}\left[\tilde{F}_{IPW,\bar{D}}(c)/\beta - \tilde{F}_{IPW,\bar{D}}(c)\right] \\
&= \sqrt{N_{\bar{D}}}\left[\tilde{F}_{IPW,\bar{D}}(c) - F_{\bar{D}}(c)\right] + \sqrt{N_{\bar{D}}}\left[F_{\bar{D}}(c)/\beta - F_{\bar{D}}(c)\right] + o_p(1) \\
&= \sqrt{N_{\bar{D}}}\left[\tilde{F}_{IPW,\bar{D}}(c) - F_{\bar{D}}(c)\right] - F_{\bar{D}}(c)\sqrt{N_{\bar{D}}}(\beta - 1) + o_p(1) \\
&= \tilde{U}(c) + \tilde{M}(c) - F_{\bar{D}}(c)(\tilde{E}^* + \tilde{C}^*) + o_p(1).
\end{aligned}$$

Consequently, we have

$$\begin{aligned}
I &\approx (1 - F_D(q_1))\frac{\sqrt{N}}{\sqrt{N_{\bar{D}}}}\left[\tilde{U}(q_1) + \tilde{M}(q_1) - F_{\bar{D}}(q_1)(\tilde{E}^* + \tilde{C}^*)\right] \\
&\quad - (1 - F_D(q_0))\frac{\sqrt{N}}{\sqrt{N_{\bar{D}}}}\left[\tilde{U}(q_0) + \tilde{M}(q_0) - F_{\bar{D}}(q_0)(\tilde{E}^* + \tilde{C}^*)\right] \\
&= I_{(1)} + I_{(2)}.
\end{aligned} \tag{A.11}$$

We then look at the second term  $II$  in (A.10). Define

$$\overline{pAUC}(\hat{p}, q) = \left[\sum_{i=1}^{N_D}\sum_{j=1}^{N_{\bar{D}}}\frac{\delta_{Di}}{\hat{p}_{Di}}\frac{\delta_{\bar{D}j}}{\hat{p}_{\bar{D}j}}I(X_{Di} > X_{\bar{D}j}, X_{\bar{D}j} \in (q_1, q_0))\right] / (N_D N_{\bar{D}}),$$

then we have

$$\begin{aligned}
&\sqrt{N}\left[\overline{pAUC}(\hat{p}, q) - pAUC\right] \\
&= \sqrt{N}\left[\overline{pAUC}(\hat{p}, q) - \overline{pAUC}(p, q)\right] + \sqrt{N}\left[\overline{pAUC}(p, q) - pAUC\right] \\
&= \sqrt{N}\frac{\partial E\left[\overline{pAUC}(p, q)\right]}{\partial \theta_D}(\hat{\theta}_D - \theta_D) + \sqrt{N}\frac{\partial E\left[\overline{pAUC}(p, q)\right]}{\partial \theta_{\bar{D}}}(\hat{\theta}_{\bar{D}} - \theta_{\bar{D}})
\end{aligned}$$

$$\begin{aligned}
& +\sqrt{N} \left\{ \sum_{i=1}^{N_D} \frac{\delta_{Di}}{p_{Di}N_D} P(X_{\bar{D}} < X_{Di}, X_{\bar{D}} \in (q_1, q_0)) - E[P(X_D > X_{\bar{D}}, X_{\bar{D}} \in (q_1, q_0))] \right\} \\
& +\sqrt{N} \left\{ \sum_{j=1}^{N_{\bar{D}}} \frac{\delta_{\bar{D}j}}{p_{\bar{D}j}N_D} P(X_D > X_{\bar{D}j}, X_{\bar{D}j} \in (q_1, q_0)) - E[P(X_D > X_{\bar{D}}, X_{\bar{D}} \in (q_1, q_0))] \right\} \\
& +o_p(1) \\
= & B + \tilde{B} + A + \tilde{A} + o_p(1),
\end{aligned}$$

where

$$\begin{aligned}
A &= \sqrt{N} \left\{ \sum_{i=1}^{N_D} \frac{\delta_{Di}}{p_{Di}N_D} P(X_{\bar{D}} < X_{Di}, X_{\bar{D}} \in (q_1, q_0)) - E[P(X_D > X_{\bar{D}}, X_{\bar{D}} \in (q_1, q_0))] \right\}, \\
\tilde{A} &= \sqrt{N} \left\{ \sum_{j=1}^{N_{\bar{D}}} \frac{\delta_{\bar{D}j}}{p_{\bar{D}j}N_D} P(X_D > X_{\bar{D}j}, X_{\bar{D}j} \in (q_1, q_0)) - E[P(X_D > X_{\bar{D}}, X_{\bar{D}} \in (q_1, q_0))] \right\}, \\
B &= \sqrt{N} \frac{\partial E[\overline{pAUC}(p)]}{\partial \theta_D} (\hat{\theta}_D - \theta_D) = -\sqrt{N} E \left[ I(X_D > X_{\bar{D}}, X_{\bar{D}} \in (q_1, q_0)) \frac{1}{p_D} \frac{\partial p_D}{\partial \theta_D} \right] (\hat{\theta}_D - \theta_D), \\
\tilde{B} &= \sqrt{N} \frac{\partial E[\overline{pAUC}(p)]}{\partial \theta_{\bar{D}}} (\hat{\theta}_{\bar{D}} - \theta_{\bar{D}}) \\
&= -\sqrt{N} E \left[ I(X_D > X_{\bar{D}}, X_{\bar{D}} \in (q_1, q_0)) \frac{1}{p_{\bar{D}}} \frac{\partial p_{\bar{D}}}{\partial \theta_{\bar{D}}} \right] (\hat{\theta}_{\bar{D}} - \theta_{\bar{D}}).
\end{aligned}$$

let  $\eta = \frac{1}{N_D N_{\bar{D}}} \sum_{i=1}^{N_D} \sum_{j=1}^{N_{\bar{D}}} \frac{\delta_{Di} \delta_{\bar{D}j}}{\hat{p}_{Di} \hat{p}_{\bar{D}j}}$  and note that

$$\begin{aligned}
& \sqrt{N}(\eta - 1) \\
= & \sqrt{N} \left[ \frac{1}{N_D N_{\bar{D}}} \sum_{i=1}^{N_D} \sum_{j=1}^{N_{\bar{D}}} \frac{\delta_{Di} \delta_{\bar{D}j}}{\hat{p}_{Di} \hat{p}_{\bar{D}j}} - \frac{1}{N_D N_{\bar{D}}} \sum_{i=1}^{N_D} \sum_{j=1}^{N_{\bar{D}}} \frac{\delta_{Di} \delta_{\bar{D}j}}{p_{Di} p_{\bar{D}j}} \right] + \sqrt{N} \left( \frac{1}{N_D N_{\bar{D}}} \sum_{i=1}^{N_D} \sum_{j=1}^{N_{\bar{D}}} \frac{\delta_{Di} \delta_{\bar{D}j}}{p_{Di} p_{\bar{D}j}} - 1 \right) \\
= & -\sqrt{N} \frac{1}{N_D N_{\bar{D}}} E \left( \sum_{i=1}^{N_D} \sum_{j=1}^{N_{\bar{D}}} \frac{\delta_{Di} \delta_{\bar{D}j}}{p_{Di}^2 p_{\bar{D}j}} \frac{\partial p_D}{\partial \theta_D} \right) (\hat{\theta}_D - \theta_D) - \sqrt{N} \frac{1}{N_D N_{\bar{D}}} E \left( \sum_{i=1}^{N_D} \sum_{j=1}^{N_{\bar{D}}} \frac{\delta_{Di} \delta_{\bar{D}j}}{p_{Di} p_{\bar{D}j}^2} \frac{\partial p_{\bar{D}}}{\partial \theta_{\bar{D}}} \right) (\hat{\theta}_{\bar{D}} - \theta_{\bar{D}}) \\
& + \sqrt{N} \left[ \left( \sum_{i=1}^{N_D} \frac{\delta_{Di}}{p_{Di} N_D} - 1 \right) + \left( \sum_{j=1}^{N_{\bar{D}}} \frac{\delta_{\bar{D}j}}{p_{\bar{D}j} N_{\bar{D}}} - 1 \right) \right] + o_p(1) \\
= & C + \tilde{C} + E + \tilde{E} + o_p(1),
\end{aligned}$$

where

$$\begin{aligned}
C &= -\frac{\sqrt{N}}{N_D N_{\bar{D}}} E \left( \sum_{i=1}^{N_D} \sum_{j=1}^{N_{\bar{D}}} \frac{\delta_{Di} \delta_{\bar{D}j}}{p_{Di}^2 p_{\bar{D}j}} \frac{\partial p_D}{\partial \theta_D} \right) (\hat{\theta}_D - \theta_D) = -\sqrt{N} E \left( \frac{1}{p_D} \frac{\partial p_D}{\partial \theta_D} \right) (\hat{\theta}_D - \theta_D), \\
\tilde{C} &= -\frac{\sqrt{N}}{N_D N_{\bar{D}}} E \left( \sum_{i=1}^{N_D} \sum_{j=1}^{N_{\bar{D}}} \frac{\delta_{Di} \delta_{\bar{D}j}}{p_{Di} p_{\bar{D}j}^2} \frac{\partial p_{\bar{D}}}{\partial \theta_{\bar{D}}} \right) (\hat{\theta}_{\bar{D}} - \theta_{\bar{D}}) = -\sqrt{N} E \left( \frac{1}{p_{\bar{D}}} \frac{\partial p_{\bar{D}}}{\partial \theta_{\bar{D}}} \right) (\hat{\theta}_{\bar{D}} - \theta_{\bar{D}}), \\
E &= \sqrt{N} \left( \sum_{i=1}^{N_D} \frac{\delta_{Di}}{p_{Di} N_D} - 1 \right), \text{ and } \tilde{E} = \sqrt{N} \left( \sum_{j=1}^{N_{\bar{D}}} \frac{\delta_{\bar{D}j}}{p_{\bar{D}j} N_{\bar{D}}} - 1 \right).
\end{aligned}$$

Then we have

$$\begin{aligned}
II &= \sqrt{N} \left[ \widehat{pAUC}(\hat{p}, q) - pAUC \right] \\
&= \sqrt{N} \left[ \widehat{pAUC}(\hat{p}, q) / \eta - pAUC \right] \\
&= \sqrt{N} \left[ \widehat{pAUC}(\hat{p}, q) - pAUC \right] + \sqrt{N} \left[ \widehat{pAUC}(\hat{p}, q) / \eta - \widehat{pAUC}(\hat{p}, q) \right] \\
&= \sqrt{N} \left[ \widehat{pAUC}(\hat{p}, q) - pAUC \right] - pAUC \times \sqrt{N}(\eta - 1) + o_p(1) \\
&= A + \tilde{A} + B + \tilde{B} - pAUC \times (C + \tilde{C} + E + \tilde{E}) + o_p(1).
\end{aligned} \tag{A.12}$$

It follows from (A.10), (A.11) and (A.12) that

$$\begin{aligned}
&\sqrt{N} \left[ \widehat{pAUC}(\hat{p}, \hat{q}) - pAUC \right] \\
&\approx I_{(1)} + I_{(2)} + II \\
&= (1 - F_D(q_1)) \frac{\sqrt{N}}{\sqrt{N_{\tilde{D}}}} \left[ \tilde{U}(q_1) + \tilde{M}(q_1) - F_{\tilde{D}}(q_1)(\tilde{E}^* + \tilde{C}^*) \right] \\
&\quad - (1 - F_D(q_0)) \frac{\sqrt{N}}{\sqrt{N_{\tilde{D}}}} \left[ \tilde{U}(q_0) + \tilde{M}(q_0) - F_{\tilde{D}}(q_0)(\tilde{E}^* + \tilde{C}^*) \right] \\
&\quad + A + \tilde{A} + B + \tilde{B} - pAUC \times (C + \tilde{C} + E + \tilde{E})
\end{aligned}$$

Therefore,  $\sqrt{N} \left[ \widehat{pAUC}(\hat{p}, \hat{q}) - pAUC \right]$  converges to a normal random variable with mean 0 and variance

$$\begin{aligned}
\sigma_{pAUC, IPW}^2 &= \text{Var}(I_{(1)} + I_{(2)} + II) \\
&= \text{Var}I_{(1)} + \text{Var}I_{(2)} + \text{Var}II \\
&\quad + 2[\text{Cov}(I_{(1)}, I_{(2)}) + \text{Cov}(I_{(1)}, II) + \text{Cov}(I_{(2)}, II)]
\end{aligned} \tag{A.13}$$

as  $N \rightarrow \infty$ .

According to Lemma A.1,

$$\begin{aligned}
\text{Var}I_{(1)} &= \frac{1}{1 - \lambda} [1 - F_D(q_1)]^2 \sigma_{\tilde{D}, IPW}^2(q_1), \\
\text{Var}I_{(2)} &= \frac{1}{1 - \lambda} [1 - F_D(q_0)]^2 \sigma_{\tilde{D}, IPW}^2(q_0),
\end{aligned} \tag{A.14}$$

where  $\sigma_{\tilde{D}, IPW}^2(\cdot)$  is given in Lemma A.1. For the term  $II$ ,

$$\text{Var}(II) = \text{Var}(A + \tilde{A} + B + \tilde{B})$$

$$\begin{aligned}
& -2pAUC \times Cov(A + \tilde{A} + B + \tilde{B}, C + \tilde{C} + E + \tilde{E}) + pAUC^2 \times Var(C + \tilde{C} + E + \tilde{E}) \\
& = II_1 + II_2 + II_3,
\end{aligned} \tag{A.15}$$

where

$$\begin{aligned}
II_1 &= Var(A) + Var(\tilde{A}) - 2pAUC \times [Cov(A, E) + Cov(\tilde{A}, \tilde{E})] + pAUC^2 \times [Var(E) + Var(\tilde{E})], \\
II_2 &= Var(B) + 2Cov(A, B) - 2pAUC \times [Cov(A, C) + Cov(B, E) + Cov(B, C)] \\
&\quad + pAUC^2 \times [Var(C) + 2Cov(E, C)], \\
II_3 &= Var(\tilde{B}) + 2Cov(\tilde{A}, \tilde{B}) - 2pAUC \times [Cov(\tilde{A}, \tilde{C}) + Cov(\tilde{B}, \tilde{E}) + Cov(\tilde{B}, \tilde{C})] \\
&\quad + pAUC^2 \times [Var(\tilde{C}) + 2Cov(\tilde{E}, \tilde{C})].
\end{aligned}$$

As  $N_D/N \rightarrow \lambda$ , we have

$$\begin{aligned}
Var(A) &= \frac{N}{N_D} Var \left[ \frac{\delta_D}{p_D} P(X_{\bar{D}} < X_D, X_{\bar{D}} \in (q_1, q_0)) \right] \\
&= \frac{1}{\lambda} \left\{ Var [P(X_{\bar{D}} < X_D, X_{\bar{D}} \in (q_1, q_0))] + E \left[ \left( \frac{1}{p_D} - 1 \right) P^2(X_{\bar{D}} < X_D, X_{\bar{D}} \in (q_1, q_0)) \right] \right\}, \\
Var(\tilde{A}) &= \frac{N}{N_{\bar{D}}} Var \left[ \frac{\delta_{\bar{D}}}{p_{\bar{D}}} P(X_{\bar{D}} < X_D, X_{\bar{D}} \in (q_1, q_0)) \right] \\
&= \frac{1}{1-\lambda} \left\{ Var [P(X_D > X_{\bar{D}}, X_{\bar{D}} \in (q_1, q_0))] + E \left[ \left( \frac{1}{p_{\bar{D}}} - 1 \right) P^2(X_D > X_{\bar{D}}, X_{\bar{D}} \in (q_1, q_0)) \right] \right\}, \\
Cov(A, E) &= \frac{N}{N_D} Cov \left[ \frac{\delta_D}{p_D} P(X_{\bar{D}} < X_D, X_{\bar{D}} \in (q_1, q_0)), \frac{\delta_D}{p_D} \right] \\
&= \frac{1}{\lambda} E \left[ \left( \frac{1}{p_D} - 1 \right) P(X_{\bar{D}} < X_D, X_{\bar{D}} \in (q_1, q_0)) \right], \\
Cov(\tilde{A}, \tilde{E}) &= \frac{N}{N_{\bar{D}}} Cov \left[ \frac{\delta_{\bar{D}}}{p_{\bar{D}}} P(X_{\bar{D}} < X_D, X_{\bar{D}} \in (q_1, q_0)), \frac{\delta_{\bar{D}}}{p_{\bar{D}}} \right] \\
&= \frac{1}{1-\lambda} E \left[ \left( \frac{1}{p_{\bar{D}}} - 1 \right) P(X_D > X_{\bar{D}}, X_{\bar{D}} \in (q_1, q_0)) \right], \\
Var(E) &= \frac{N}{N_D} Var \left( \frac{\delta_D}{p_D} \right) = \frac{1}{\lambda} E \left( \frac{1}{p_D} - 1 \right), \\
Var(\tilde{E}) &= \frac{N}{N_{\bar{D}}} Var \left( \frac{\delta_{\bar{D}}}{p_{\bar{D}}} \right) = \frac{1}{1-\lambda} E \left( \frac{1}{p_{\bar{D}}} - 1 \right).
\end{aligned}$$

So

$$\begin{aligned}
& II_1 \\
&= \frac{1}{\lambda} \left\{ Var [P(X_{\bar{D}} < X_D, X_{\bar{D}} \in (q_1, q_0))] + E \left[ \left( \frac{1}{p_D} - 1 \right) P^2(X_{\bar{D}} < X_D, X_{\bar{D}} \in (q_1, q_0)) \right] \right\}
\end{aligned}$$

$$\begin{aligned}
& -\frac{1}{1-\lambda} \left\{ \text{Var} [P(X_D > X_{\bar{D}}, X_{\bar{D}} \in (q_1, q_0))] + E \left[ \left( \frac{1}{p_{\bar{D}}} - 1 \right) P^2(X_D > X_{\bar{D}}, X_{\bar{D}} \in (q_1, q_0)) \right] \right\} \\
& -\frac{pAUC}{\lambda} \left\{ 2E \left[ \left( \frac{1}{p_D} - 1 \right) P(X_{\bar{D}} < X_D, X_{\bar{D}} \in (q_1, q_0)) \right] - pAUC E \left( \frac{1}{p_D} - 1 \right) \right\} \\
& -\frac{pAUC}{1-\lambda} \left\{ 2E \left[ \left( \frac{1}{p_{\bar{D}}} - 1 \right) P(X_D > X_{\bar{D}}, X_{\bar{D}} \in (q_1, q_0)) \right] - pAUC E \left( \frac{1}{p_{\bar{D}}} - 1 \right) \right\} \\
= & \frac{1}{\lambda} \left\{ \text{Var} [P(X_{\bar{D}} < X_D, X_{\bar{D}} \in (q_1, q_0))] + E \left[ \left( \frac{1}{p_D} - 1 \right) P^2(X_{\bar{D}} < X_D, X_{\bar{D}} \in (q_1, q_0)) \right] \right\} \\
& -\frac{1}{1-\lambda} \left\{ \text{Var} [P(X_D > X_{\bar{D}}, X_{\bar{D}} \in (q_1, q_0))] + E \left[ \left( \frac{1}{p_{\bar{D}}} - 1 \right) P^2(X_D > X_{\bar{D}}, X_{\bar{D}} \in (q_1, q_0)) \right] \right\} \\
& -\frac{pAUC}{\lambda} \left\{ E \left[ \left( \frac{1}{p_D} - 1 \right) P(X_{\bar{D}} < X_D, X_{\bar{D}} \in (q_1, q_0)) \right] + \text{Cov} \left[ \frac{1}{p_D} - 1, P(X_{\bar{D}} < X_D, X_{\bar{D}} \in (q_1, q_0)) \right] \right\} \\
& -\frac{pAUC}{1-\lambda} \left\{ E \left[ \left( \frac{1}{p_{\bar{D}}} - 1 \right) P(X_D > X_{\bar{D}}, X_{\bar{D}} \in (q_1, q_0)) \right] + \text{Cov} \left[ \frac{1}{p_{\bar{D}}} - 1, P(X_D > X_{\bar{D}}, X_{\bar{D}} \in (q_1, q_0)) \right] \right\}.
\end{aligned}$$

Similar, we can show that

$$\begin{aligned}
II_2 &= -\frac{1}{\lambda} [pAUC \times a_D - s_D]^T I_D^{-1} [pAUC \times a_D - s_D], \\
II_3 &= -\frac{1}{1-\lambda} [pAUC \times a_{\bar{D}} - s_{\bar{D}}]^T I_{\bar{D}}^{-1} [pAUC \times a_{\bar{D}} - s_{\bar{D}}],
\end{aligned}$$

where  $s_d = E[I(X_D > X_{\bar{D}}, X_{\bar{D}} \in (q_1, q_0))(1/p_d)(\partial p_d / \partial \theta_d)]$ ,  $a_d$  are defined in Lemma A.1, for  $d = D, \bar{D}$ .

Then,  $\text{Cov}(I_{(1)}, I_{(2)})$ ,  $\text{Cov}(I_{(1)}, II)$  and  $\text{Cov}(I_{(2)}, II)$  can be derived similarly, and we get

$$\begin{aligned}
\text{Cov}(I_{(1)}, I_{(2)}) &= -\frac{1}{1-\lambda} [1 - F_D(q_0)][1 - F_D(q_1)] \times \\
& \left\{ \text{Cov} \left[ \left( \frac{1}{p_{\bar{D}}} - 1 \right) I(X_{\bar{D}} < q_1), I(X_{\bar{D}} < q_0) \right] \right. \\
& + \text{Cov}[I(X_{\bar{D}} < q_0), I(X_{\bar{D}} < q_1)] - F_{\bar{D}}(q_1) \times \text{Cov} \left[ \frac{1}{p_{\bar{D}}} - 1, I(X_{\bar{D}} < q_0) \right] \\
& \left. - [SPE(q_0) \times a_{\bar{D}} - b_{\bar{D}}(q_0)]^T I_{\bar{D}}^{-1} [SPE(q_1) \times a_{\bar{D}} - b_{\bar{D}}(q_1)] \right\}, \quad (\text{A.16})
\end{aligned}$$

$$\begin{aligned}
\text{Cov}(I_{(1)}, II) &= \frac{1}{1-\lambda} [1 - F_D(q_1)] \times \\
& \left\{ \text{Cov} \left[ \left( \frac{1}{p_{\bar{D}}} - 1 \right) P(X_{\bar{D}} < X_D, X_{\bar{D}} \in (q_1, q_0)), I(X_{\bar{D}} < q_1) \right] \right. \\
& + \text{Cov}[P(X_{\bar{D}} < X_D, X_{\bar{D}} \in (q_1, q_0)), I(X_{\bar{D}} < q_1)] \\
& \left. - pAUC \times \text{Cov} \left[ \left( \frac{1}{p_{\bar{D}}} - 1 \right), I(X_{\bar{D}} < q_1) \right] \right\}
\end{aligned}$$

$$-\left[ pAUC(t_0, t_1) \times a_{\bar{D}} - s_{\bar{D}} \right]^T I_{\bar{D}}^{-1} \left[ SPE(q_1) \times a_{\bar{D}} - b_{\bar{D}}(q_1) \right] \Big\}, \quad (\text{A.17})$$

and

$$\begin{aligned} Cov(I_{(2)}, II) = & -\frac{1}{1-\lambda} [1 - F_D(q_0)] \times \\ & \left\{ Cov \left[ \left( \frac{1}{p_{\bar{D}}} - 1 \right) P(X_{\bar{D}} < X_D, X_{\bar{D}} \in (q_1, q_0)), I(X_{\bar{D}} < q_0) \right] \right. \\ & + Cov [P(X_{\bar{D}} < X_D, X_{\bar{D}} \in (q_1, q_0)), I(X_{\bar{D}} < q_0)] \\ & - pAUC \times Cov \left[ \left( \frac{1}{p_{\bar{D}}} - 1 \right), I(X_{\bar{D}} < q_0) \right] \\ & \left. - [pAUC(t_0, t_1) \times a_{\bar{D}} - s_{\bar{D}}]^T I_{\bar{D}}^{-1} [SPE(q_1) \times a_{\bar{D}} - b_{\bar{D}}(q_0)] \right\}, \quad (\text{A.18}) \end{aligned}$$

Finally, followed by equations (A.13), (A.14), (A.15), (A.16), (A.17) and (A.18), the proof is complete.

## Appendix D. Results of simulation studies for Bernoulli sampling design

**Table 1:** Estimate, bias, variance, median of estimated variance ( $Med(\widehat{Var})$ ) and coverage of 95% confidence interval (CI) of  $ROC(t)$  estimator using the empirical method, IPW method with the estimated sampling probabilities  $\hat{p}^{Str}$  and  $\hat{p}^{Aux}$ , for scenarios where  $\rho_{XV^*} = 0.5$ ,  $\rho_{XW} = 0.5$ ,  $\rho_{WV^*} = 0.1$ ,  $\mu_{X_{\bar{D}}} = 0$ , and  $\mu_{X_D} = 1$  in **Bernoulli sampling**.

| Method                      | $n_D = n_{\bar{D}}$ | Estimate | Bias $\times 100$ | Var $\times N$ | $Med(\widehat{Var}) \times N$ | Coverage of 95% CI |
|-----------------------------|---------------------|----------|-------------------|----------------|-------------------------------|--------------------|
| $ROC(0.1) = 0.3891$         |                     |          |                   |                |                               |                    |
| $\widehat{ROC}_{em}$        | 100                 | 0.3414   | -4.7713           | 11.677         | 11.742                        | 93.5%              |
|                             | 250                 | 0.3399   | -4.9206           | 11.815         | 11.827                        | 85.1%              |
|                             | 500                 | 0.3396   | -4.9533           | 11.760         | 11.991                        | 73.2%              |
| $\widehat{ROC}_{IPW}^{Str}$ | 100                 | 0.3905   | 0.1341            | 11.813         | 11.235                        | 95.6%              |
|                             | 250                 | 0.3887   | -0.0473           | 12.192         | 11.753                        | 95.0%              |
|                             | 500                 | 0.3896   | 0.0431            | 12.194         | 11.892                        | 95.4%              |
| $\widehat{ROC}_{IPW}^{Aux}$ | 100                 | 0.3907   | 0.1603            | 10.604         | 9.858                         | 95.0%              |
|                             | 250                 | 0.3890   | -0.0113           | 10.606         | 10.312                        | 95.1%              |
|                             | 500                 | 0.3892   | 0.0072            | 10.779         | 10.434                        | 95.0%              |
| $ROC(0.2) = 0.5629$         |                     |          |                   |                |                               |                    |
| $\widehat{ROC}_{em}$        | 100                 | 0.5060   | -5.6969           | 10.640         | 11.073                        | 89.3%              |
|                             | 250                 | 0.5054   | -5.7500           | 10.934         | 11.234                        | 77.7%              |
|                             | 500                 | 0.5058   | -5.7166           | 10.888         | 11.186                        | 60.7%              |
| $\widehat{ROC}_{IPW}^{Str}$ | 100                 | 0.5611   | -0.1841           | 10.400         | 10.285                        | 95.5%              |
|                             | 250                 | 0.5612   | -0.1696           | 10.624         | 10.465                        | 95.3%              |
|                             | 500                 | 0.5623   | -0.0610           | 10.241         | 10.540                        | 95.3%              |
| $\widehat{ROC}_{IPW}^{Aux}$ | 100                 | 0.5611   | -0.1795           | 8.958          | 8.827                         | 95.4%              |
|                             | 250                 | 0.5613   | -0.1626           | 9.124          | 8.941                         | 95.3%              |
|                             | 500                 | 0.5622   | -0.0709           | 8.743          | 8.998                         | 95.5%              |
| $ROC(0.5) = 0.8413$         |                     |          |                   |                |                               |                    |
| $\widehat{ROC}_{em}$        | 100                 | 0.7983   | -4.3073           | 5.548          | 5.800                         | 85.0%              |
|                             | 250                 | 0.7976   | -4.3713           | 5.471          | 5.681                         | 70.2%              |
|                             | 500                 | 0.7989   | -4.2402           | 5.479          | 5.653                         | 52.2%              |
| $\widehat{ROC}_{IPW}^{Str}$ | 100                 | 0.8389   | -0.2423           | 4.784          | 4.550                         | 96.0%              |
|                             | 250                 | 0.8388   | -0.2592           | 4.870          | 4.620                         | 94.6%              |
|                             | 500                 | 0.8399   | -0.1423           | 4.520          | 4.621                         | 95.2%              |
| $\widehat{ROC}_{IPW}^{Aux}$ | 2000                | 0.8392   | -0.2159           | 4.206          | 3.952                         | 95.5%              |
|                             | 250                 | 0.8390   | -0.2348           | 4.270          | 4.039                         | 95.0%              |
|                             | 500                 | 0.8399   | -0.1477           | 3.974          | 4.029                         | 95.0%              |



**Table 2:** Estimate, bias, variance, median of estimated variance ( $Med(\widehat{Var})$ ) and coverage of 95% confidence interval (CI) of  $AUC$  and  $pAUC(t_0, t_1)$  estimators using the empirical method, IPW method with the estimated sampling probabilities  $\hat{p}^{Str}$  and  $\hat{p}^{Aux}$ , for scenarios where  $\rho_{XV^*} = 0.5$ ,  $\rho_{XW} = 0.5$ ,  $\rho_{WV^*} = 0.1$ ,  $\mu_{X_{\bar{D}}} = 0$ , and  $\mu_{X_D} = 1$  in **Bernoulli sampling**.

| Method                       | $n_D = n_{\bar{D}}$ | Estimate | Bias $\times 100$ | Var $\times N$ | $Med(\widehat{Var}) \times N$ | Coverage of 95% CI |
|------------------------------|---------------------|----------|-------------------|----------------|-------------------------------|--------------------|
| $AUC = 0.7602$               |                     |          |                   |                |                               |                    |
| $\widehat{AUC}_{em}$         | 100                 | 0.7273   | -3.2975           | 2.4736         | 2.4664                        | 83.9%              |
|                              | 250                 | 0.7267   | -3.3503           | 2.3962         | 2.4739                        | 65.7%              |
|                              | 500                 | 0.7269   | -3.3387           | 2.5145         | 2.4814                        | 41.1%              |
| $\widehat{AUC}_{IPW}^{Str}$  | 100                 | 0.7611   | 0.0842            | 2.1561         | 2.0903                        | 94.7%              |
|                              | 5000                | 0.7606   | 0.0310            | 2.1307         | 2.0985                        | 94.8%              |
|                              | 10000               | 0.7606   | 0.0373            | 2.2022         | 2.0965                        | 94.3%              |
| $\widehat{AUC}_{IPW}^{Aux}$  | 100                 | 0.7607   | 0.0443            | 1.7517         | 1.6180                        | 94.3%              |
|                              | 250                 | 0.7606   | 0.0392            | 1.6479         | 1.6144                        | 95.0%              |
|                              | 500                 | 0.7605   | 0.0285            | 1.7007         | 1.6103                        | 94.3%              |
| $pAUC(0, 0.1) = 0.0244$      |                     |          |                   |                |                               |                    |
| $\widehat{pAUC}_{em}$        | 100                 | 0.0200   | -0.4393           | 0.0687         | 0.0679                        | 94.6%              |
|                              | 250                 | 0.0203   | -0.4042           | 0.0685         | 0.0699                        | 87.7%              |
|                              | 500                 | 0.0205   | -0.3868           | 0.0690         | 0.0709                        | 76.5%              |
| $\widehat{pAUC}_{IPW}^{Str}$ | 100                 | 0.0230   | -0.1315           | 0.0724         | 0.0645                        | 94.2%              |
|                              | 250                 | 0.0237   | -0.0697           | 0.0720         | 0.0682                        | 94.6%              |
|                              | 500                 | 0.0239   | -0.0422           | 0.0724         | 0.0698                        | 94.4%              |
| $\widehat{pAUC}_{IPW}^{Aux}$ | 100                 | 0.0230   | -0.1331           | 0.0658         | 0.0618                        | 95.0%              |
|                              | 250                 | 0.0237   | -0.0698           | 0.0640         | 0.0646                        | 95.7%              |
|                              | 500                 | 0.0239   | -0.0444           | 0.0646         | 0.0658                        | 95.5%              |
| $pAUC(0, 0.2) = 0.0726$      |                     |          |                   |                |                               |                    |
| $\widehat{pAUC}_{em}$        | 100                 | 0.0620   | -1.0550           | 0.2928         | 0.2972                        | 91.3%              |
|                              | 250                 | 0.0627   | -0.9944           | 0.2961         | 0.2985                        | 80.5%              |
|                              | 500                 | 0.0630   | -0.9611           | 0.2953         | 0.3027                        | 64.1%              |
| $\widehat{pAUC}_{IPW}^{Str}$ | 100                 | 0.0700   | -0.2636           | 0.2895         | 0.2692                        | 95.0%              |
|                              | 250                 | 0.0711   | -0.1505           | 0.2989         | 0.2810                        | 94.5%              |
|                              | 500                 | 0.0717   | -0.0912           | 0.2946         | 0.2852                        | 95.1%              |
| $\widehat{pAUC}_{IPW}^{Aux}$ | 100                 | 0.0699   | -0.2716           | 0.2489         | 0.2535                        | 95.9%              |
|                              | 250                 | 0.0711   | -0.1485           | 0.2510         | 0.2616                        | 95.9%              |
|                              | 500                 | 0.0716   | -0.0957           | 0.2495         | 0.2646                        | 96.3%              |

**Table 3:** Efficiency comparison of the IPW  $ROC(t)$ ,  $AUC$  and  $pAUC(t_0, t_1)$  estimators with three different types of estimated sampling weights, for scenarios with varying  $\mu_{X_D}$  (the population mean of the biomarker  $X$  among cases), where  $n_D = n_{\bar{D}} = 500$ ,  $\rho_{XV^*} = 0.3$ ,  $\rho_{WV^*} = 0$ , and  $\mu_{X_{\bar{D}}} = 0$ .

| $\mu_{X_D}$ | Parameter                           | Bernoulli Sampling |       |       |       | Finite-population stratified sampling |       |       |       |       |
|-------------|-------------------------------------|--------------------|-------|-------|-------|---------------------------------------|-------|-------|-------|-------|
|             |                                     | $\rho_{XW}$        |       |       |       | $\rho_{XW}$                           |       |       |       |       |
|             |                                     | 0.1                | 0.3   | 0.5   | 0.7   | 0.1                                   | 0.3   | 0.5   | 0.7   |       |
| 0           | $\hat{p}^{Aux}$ vs. $\hat{p}^{Str}$ | $ROC(0.1)$         | 1.002 | 1.029 | 1.080 | 1.135                                 | 1.014 | 1.024 | 1.085 | 1.141 |
|             |                                     | $ROC(0.2)$         | 1.017 | 1.049 | 1.101 | 1.232                                 | 1.018 | 1.045 | 1.120 | 1.245 |
|             |                                     | $AUC$              | 1.034 | 1.104 | 1.241 | 1.513                                 | 1.042 | 1.106 | 1.248 | 1.549 |
|             |                                     | $pAUC(0, 0.1)$     | 1.008 | 1.027 | 1.084 | 1.120                                 | 1.019 | 1.022 | 1.087 | 1.133 |
|             |                                     | $pAUC(0, 0.2)$     | 1.023 | 1.059 | 1.101 | 1.220                                 | 1.026 | 1.043 | 1.112 | 1.231 |
| 0.6         | $\hat{p}^{Aux}$ vs. $\hat{p}^{Str}$ | $ROC(0.1)$         | 1.006 | 1.045 | 1.104 | 1.182                                 | 1.007 | 1.025 | 1.102 | 1.166 |
|             |                                     | $ROC(0.2)$         | 1.023 | 1.065 | 1.123 | 1.261                                 | 1.017 | 1.061 | 1.134 | 1.258 |
|             |                                     | $AUC$              | 1.035 | 1.105 | 1.242 | 1.511                                 | 1.039 | 1.104 | 1.241 | 1.537 |
|             |                                     | $pAUC(0, 0.1)$     | 1.009 | 1.037 | 1.100 | 1.170                                 | 1.021 | 1.028 | 1.107 | 1.181 |
|             |                                     | $pAUC(0, 0.2)$     | 1.029 | 1.065 | 1.131 | 1.272                                 | 1.033 | 1.046 | 1.134 | 1.272 |
| 1.5         | $\hat{p}^{Aux}$ vs. $\hat{p}^{Str}$ | $ROC(0.1)$         | 1.004 | 1.043 | 1.106 | 1.181                                 | 1.003 | 1.031 | 1.109 | 1.186 |
|             |                                     | $ROC(0.2)$         | 1.012 | 1.054 | 1.121 | 1.245                                 | 1.017 | 1.048 | 1.128 | 1.252 |
|             |                                     | $AUC$              | 1.028 | 1.094 | 1.204 | 1.411                                 | 1.028 | 1.088 | 1.192 | 1.424 |
|             |                                     | $pAUC(0, 0.1)$     | 1.001 | 1.041 | 1.112 | 1.167                                 | 1.021 | 1.025 | 1.111 | 1.170 |
|             |                                     | $pAUC(0, 0.2)$     | 1.024 | 1.055 | 1.141 | 1.253                                 | 1.036 | 1.039 | 1.127 | 1.254 |

## Appendix E. Results for prostate cancer study example

**Table 4:** Prostate cancer study example: Estimate, variance, 95% confidence interval (CI) and corresponding length of 95% CI for  $ROC(t)$ ,  $AUC$ , and  $pAUC(t_0, t_1)$  estimators using the empirical method and IPW methods with the estimated sampling probabilities  $\hat{p}^{Str}$  and  $\hat{p}^{Aux}$ .

|                | Method                   | Est   | Var $\times N$ | 95% CI         | Length of 95% CI |
|----------------|--------------------------|-------|----------------|----------------|------------------|
| $ROC(0.1)$     | Empirical                | 0.250 | 1,859          | (0.134, 0.366) | 0.232            |
|                | IPW with $\hat{p}^{Str}$ | 0.317 | 1.704          | (0.206, 0.428) | 0.222            |
|                | IPW with $\hat{p}^{Aux}$ | 0.315 | 1.664          | (0.206, 0.425) | 0.219            |
| $ROC(0.2)$     | Empirical                | 0.367 | 2.371          | (0.236, 0.497) | 0.262            |
|                | IPW with $\hat{p}^{Str}$ | 0.425 | 1.935          | (0.307, 0.543) | 0.236            |
|                | IPW with $\hat{p}^{Aux}$ | 0.423 | 1.853          | (0.307, 0.539) | 0.231            |
| $AUC$          | Empirical                | 0.647 | 0.645          | (0.579, 0.715) | 0.136            |
|                | IPW with $\hat{p}^{Str}$ | 0.672 | 0.570          | (0.608, 0.736) | 0.128            |
|                | IPW with $\hat{p}^{Aux}$ | 0.673 | 0.541          | (0.611, 0.736) | 0.125            |
| $pAUC(0, 0.1)$ | Empirical                | 0.010 | 0.011          | (0.001, 0.019) | 0.018            |
|                | IPW with $\hat{p}^{Str}$ | 0.018 | 0.013          | (0.009, 0.028) | 0.019            |
|                | IPW with $\hat{p}^{Aux}$ | 0.017 | 0.013          | (0.008, 0.027) | 0.019            |
| $pAUC(0, 0.2)$ | Empirical                | 0.047 | 0.045          | (0.029, 0.065) | 0.036            |
|                | IPW with $\hat{p}^{Str}$ | 0.060 | 0.044          | (0.042, 0.078) | 0.036            |
|                | IPW with $\hat{p}^{Aux}$ | 0.060 | 0.044          | (0.042, 0.078) | 0.036            |

## Appendix F. Results for using the estimated sampling probabilities based on the model including additional variables uncorrelated with the biomarker

We here adopt the same simulation setting for the finite-population stratified sampling design as described in Section 3 of the main text. In addition, we further independently generate five more variables  $W_1^*, \dots, W_5^*$  from the standard normal distribution; each of them is independent of disease outcome  $D$  and also uncorrelated with the biomarker  $X$ , auxiliary variables  $V^*$  and  $W$ .

For each generated data set, we estimate the points on the ROC curve, the AUC, and the partial AUC using the proposed IPW method with three different types of estimated sampling probabilities for cases/controls:  $\hat{p}_D^{Str} / \hat{p}_{\bar{D}}^{Str}$  (conditional on  $V$  only),  $\hat{p}_D^{Aux} / \hat{p}_{\bar{D}}^{Aux}$  (based on a logistic regression of

sampling probability conditional on  $V, V^*$  and  $W$ ), and  $\hat{p}_D^{Aux^*} / \hat{p}_D^{Aux}$  (based on a logistic regression of sampling probability conditional on  $V, V^*, W$  and  $W_1^*, \dots, W_5^*$ ). The simulation results are presented in the following Table 5.

**Table 5:** Estimate, bias, variance, and coverage of 95% confidence interval (CI) of  $ROC(t)$ ,  $AUC$  and  $pAUC(t_0, t_1)$  estimators using the IPW method with the estimated sampling probabilities  $\hat{p}^{Str}$ ,  $\hat{p}^{Aux}$ , and  $\hat{p}^{Aux^*}$  for scenarios where  $\rho_{XV^*} = 0.5$ ,  $\rho_{XW} = 0.5$ , and  $\rho_{WV^*} = 0.1$  in finite-population stratified sampling.

| Method                        | $n_D = n_{\bar{D}}$ | Estimate | Bias $\times 100$ | Var $\times N$ | Coverage of 95% CI |
|-------------------------------|---------------------|----------|-------------------|----------------|--------------------|
| $ROC(0.1) = 0.3891$           |                     |          |                   |                |                    |
| $\widehat{ROC}_{IPW}^{Str}$   | 100                 | 0.3901   | 0.0968            | 12.183         | 94.5%              |
|                               | 250                 | 0.3882   | -0.0961           | 12.064         | 95.0%              |
|                               | 500                 | 0.3876   | -0.1550           | 11.999         | 95.3%              |
| $\widehat{ROC}_{IPW}^{Aux}$   | 100                 | 0.3906   | 0.1475            | 11.006         | 94.5%              |
|                               | 250                 | 0.3883   | -0.0842           | 10.555         | 94.9%              |
|                               | 500                 | 0.3873   | -0.1842           | 10.415         | 95.2%              |
| $\widehat{ROC}_{IPW}^{Aux^*}$ | 100                 | 0.3907   | 0.1582            | 11.657         | 93.4%              |
|                               | 250                 | 0.3883   | -0.0872           | 10.784         | 94.4%              |
|                               | 500                 | 0.3873   | -0.1867           | 10.547         | 95.0%              |
| $ROC(0.2) = 0.5629$           |                     |          |                   |                |                    |
| $\widehat{ROC}_{IPW}^{Str}$   | 100                 | 0.5611   | -0.1819           | 10.472         | 95.2%              |
|                               | 250                 | 0.5607   | -0.2263           | 10.409         | 95.0%              |
|                               | 500                 | 0.5615   | -0.1375           | 10.499         | 95.3%              |
| $\widehat{ROC}_{IPW}^{Aux}$   | 100                 | 0.5622   | -0.0735           | 8.977          | 95.2%              |
|                               | 250                 | 0.5608   | -0.2110           | 8.904          | 95.3%              |
|                               | 500                 | 0.5613   | -0.1581           | 9.033          | 94.9%              |
| $\widehat{ROC}_{IPW}^{Aux^*}$ | 100                 | 0.5620   | -0.0924           | 9.478          | 94.5%              |
|                               | 250                 | 0.5607   | -0.2223           | 9.035          | 95.1%              |
|                               | 500                 | 0.5613   | -0.1595           | 9.099          | 95.0%              |
| $AUC = 0.7602$                |                     |          |                   |                |                    |
| $\widehat{AUC}_{IPW}^{Str}$   | 100                 | 0.7596   | -0.0639           | 2.180          | 94.4%              |
|                               | 250                 | 0.7603   | 0.0085            | 2.035          | 95.3%              |
|                               | 500                 | 0.7604   | 0.0103            | 2.116          | 94.9%              |
| $\widehat{AUC}_{IPW}^{Aux}$   | 100                 | 0.7601   | -0.0110           | 1.705          | 94.2%              |
|                               | 250                 | 0.7604   | 0.0175            | 1.560          | 95.4%              |

*Continued on next page*

Table 5 – Continued from previous page

| Method                         | $n_D = n_{\bar{D}}$ | Estimate | Bias $\times 100$ | Var $\times N$ | Coverage of 95% CI |
|--------------------------------|---------------------|----------|-------------------|----------------|--------------------|
| $\widehat{AUC}_{IPW}^{Aux^*}$  | 500                 | 0.7602   | -0.0009           | 1.642          | 94.9%              |
|                                | 100                 | 0.7601   | -0.0129           | 1.796          | 93.6%              |
|                                | 250                 | 0.7604   | 0.0158            | 1.597          | 95.0%              |
|                                | 500                 | 0.7602   | -0.0012           | 1.659          | 94.8%              |
| $pAUC(0, 0.1) = 0.0244$        |                     |          |                   |                |                    |
| $\widehat{pAUC}_{IPW}^{Str}$   | 100                 | 0.0231   | -0.1307           | 0.069          | 94.5%              |
|                                | 250                 | 0.0236   | -0.0717           | 0.070          | 95.1%              |
|                                | 500                 | 0.0238   | -0.0597           | 0.072          | 94.8%              |
| $\widehat{pAUC}_{IPW}^{Aux}$   | 100                 | 0.0231   | -0.1256           | 0.063          | 94.8%              |
|                                | 250                 | 0.0236   | -0.0720           | 0.061          | 95.3%              |
|                                | 500                 | 0.0238   | -0.0603           | 0.063          | 95.4%              |
| $\widehat{pAUC}_{IPW}^{Aux^*}$ | 100                 | 0.0231   | -0.1287           | 0.066          | 94.5%              |
|                                | 250                 | 0.0236   | -0.0729           | 0.063          | 95.7%              |
|                                | 500                 | 0.0238   | -0.0597           | 0.064          | 95.2%              |
| $pAUC(0, 0.2) = 0.0726$        |                     |          |                   |                |                    |
| $\widehat{pAUC}_{IPW}^{Str}$   | 100                 | 0.0699   | -0.2680           | 0.289          | 94.6%              |
|                                | 250                 | 0.0711   | -0.1526           | 0.287          | 94.9%              |
|                                | 500                 | 0.0714   | -0.1186           | 0.295          | 94.3%              |
| $\widehat{pAUC}_{IPW}^{Aux}$   | 100                 | 0.0700   | -0.2584           | 0.253          | 95.8%              |
|                                | 250                 | 0.0711   | -0.1500           | 0.244          | 96.1%              |
|                                | 500                 | 0.0714   | -0.1241           | 0.245          | 95.7%              |
| $\widehat{pAUC}_{IPW}^{Aux^*}$ | 100                 | 0.0699   | -0.2681           | 0.262          | 95.4%              |
|                                | 250                 | 0.0711   | -0.1535           | 0.248          | 96.1%              |
|                                | 500                 | 0.0713   | -0.1264           | 0.248          | 95.6%              |

## Appendix G. Results for using the estimated sampling probabilities based on misspecified models

Consider a binary disease outcome  $D$  with prevalence  $P(D = 1) = \lambda = 0.1$ . Let  $X$  be a single biomarker. We consider two auxiliary variables  $V^*$  and  $W$ . Among the controls,  $(X, V^*, W)$  follows a multivariate normal distribution with zero mean and covariance  $\Sigma$ ; among the cases,  $(X, V^*, W)$  has a multivariate normal distribution with mean  $(1, 0.5, 0.5)^T$  and covariance  $\Sigma$ , where

$\Sigma = \begin{pmatrix} 1 & \rho_{XV^*} & \rho_{XW} \\ \rho_{XV^*} & 1 & \rho_{WV^*} \\ \rho_{XW} & \rho_{WV^*} & 1 \end{pmatrix}$  in which  $\rho_{XV^*}$ ,  $\rho_{XW}$  and  $\rho_{WV^*}$  represent the correlations between  $X$  and  $V^*$ ,  $X$  and  $W$ ,  $W$  and  $V^*$ , respectively. Subjects are stratified into two strata based on the value of  $V^*$ . Here we consider the following two scenarios: In scenario (1), we set  $\rho_{XV^*} = 0.5$ ,  $\rho_{XW} = 0.5$ ,  $\rho_{WV^*} = 0.1$ , and the discrete stratum variable  $V_1$  equals  $V_1 = 1$  if  $V^* \leq \Phi^{-1}(0.5)$ , and  $V_1 = 2$  if  $V^* \geq \Phi^{-1}(0.5)$ , where  $\Phi$  is the CDF of the standard normal distribution; in scenario (2), we set  $\rho_{XV^*} = 0.8$ ,  $\rho_{XW} = 0.5$ ,  $\rho_{WV^*} = 0.1$ , and the discrete stratum variable  $V_2$  equals  $V_2 = 1$  if  $\Phi^{-1}(0.1) \leq V^* \leq \Phi^{-1}(0.75)$ , and  $V_2 = 2$  otherwise.

In phase one, we randomly draw  $N = 2000, 5000, \text{ or } 10000$  subjects from the population whose disease status  $D$  and auxiliary variables  $V^*$  and  $W$  are measured. In phase two, subsamples are randomly sampled from the phase-one cohort and the biomarker  $X$  is measured. We here adopt the finite-population stratified sampling scheme. Firstly,  $n_D = 0.5\lambda N$  cases are randomly sampled without replacement. Then, according to the sampling strata defined by  $V_1$  or  $V_2$ , in each stratum equal numbers of controls as cases are randomly selected without replacement. With the phase-one sample size  $N = 2000, 5000, \text{ and } 10000$ , the corresponding numbers of cases and controls sampled equal  $n_D = n_{\bar{D}} = 100, 250, \text{ and } 500$ , respectively.

For estimation of the points on the ROC curve, the AUC, and the partial AUC using the proposed IPW method, we consider the estimated sampling probabilities for cases/controls based on two different misspecified models:  $\hat{p}_D^{Mis1}/\hat{p}_{\bar{D}}^{Mis1}$  (based on a logistic regression of sampling probability conditional on  $V^*$  and  $W$ ), and  $\hat{p}_D^{Mis2}/\hat{p}_{\bar{D}}^{Mis2}$  (based on a logistic regression of sampling probability conditional on  $W$  only). The simulation results for scenario (1) and (2) are shown in Table 6 and Table 7, respectively.

**Table 6:** Estimate, bias, variance, and coverage of 95% confidence interval (CI) of  $ROC(t)$ ,  $AUC$  and  $pAUC(t_0, t_1)$  estimators using the IPW method with the estimated sampling probabilities  $\hat{p}^{Mis1}$  and  $\hat{p}^{Mis2}$ , for scenario (1) with the discrete stratum variable  $V_1$ ,  $\rho_{XV^*} = 0.5$ ,  $\rho_{XW} = 0.5$ , and  $\rho_{WV^*} = 0.1$  in finite-population stratified sampling.

| Method              | $n_D = n_{\bar{D}}$ | Estimate | Bias $\times 100$ | Var $\times N$ | Coverage of 95% CI |
|---------------------|---------------------|----------|-------------------|----------------|--------------------|
| $ROC(0.1) = 0.3891$ |                     |          |                   |                |                    |

*Continued on next page*

Table 6 – Continued from previous page

| Method                        | $n_D = n_{\bar{D}}$ | Estimate | Bias $\times 100$ | Var $\times N$ | Coverage of 95% CI |
|-------------------------------|---------------------|----------|-------------------|----------------|--------------------|
| $\widehat{ROC}_{IPW}^{Mis1}$  | 100                 | 0.3885   | -0.0634           | 10.183         | 95.2%              |
|                               | 250                 | 0.3879   | -0.1263           | 9.865          | 95.9%              |
|                               | 500                 | 0.3877   | -0.1394           | 10.394         | 95.1%              |
| $\widehat{ROC}_{IPW}^{Mis2}$  | 100                 | 0.3453   | -4.3878           | 10.385         | 95.0%              |
|                               | 250                 | 0.3445   | -4.4679           | 10.131         | 88.3%              |
|                               | 500                 | 0.3434   | -4.5783           | 10.762         | 74.9%              |
| ROC(0.2) = 0.5629             |                     |          |                   |                |                    |
| $\widehat{ROC}_{IPW}^{Mis1}$  | 100                 | 0.5573   | -0.5572           | 8.650          | 95.8%              |
|                               | 250                 | 0.5578   | -0.5083           | 8.754          | 95.4%              |
|                               | 500                 | 0.5580   | -0.4904           | 8.734          | 94.7%              |
| $\widehat{ROC}_{IPW}^{Mis2}$  | 100                 | 0.5094   | -5.3558           | 9.132          | 90.1%              |
|                               | 250                 | 0.5105   | -5.2434           | 9.259          | 80.4%              |
|                               | 500                 | 0.5105   | -5.2408           | 9.303          | 63.2%              |
| AUC = 0.7602                  |                     |          |                   |                |                    |
| $\widehat{AUC}_{IPW}^{Mis1}$  | 100                 | 0.7579   | -0.2367           | 1.582          | 95.1%              |
|                               | 250                 | 0.7585   | -0.1775           | 1.566          | 95.1%              |
|                               | 500                 | 0.7584   | -0.1847           | 1.671          | 94.4%              |
| $\widehat{AUC}_{IPW}^{Mis2}$  | 100                 | 0.7295   | -3.0726           | 1.786          | 84.1%              |
|                               | 250                 | 0.7301   | -3.0165           | 1.738          | 67.1%              |
|                               | 500                 | 0.7299   | -3.0311           | 1.904          | 41.4%              |
| pAUC(0, 0.1) = 0.0244         |                     |          |                   |                |                    |
| $\widehat{pAUC}_{IPW}^{Mis1}$ | 100                 | 0.0231   | -0.1213           | 0.059          | 95.8%              |
|                               | 250                 | 0.0238   | -0.0559           | 0.058          | 96.4%              |
|                               | 500                 | 0.0240   | -0.0351           | 0.064          | 95.5%              |
| $\widehat{pAUC}_{IPW}^{Mis2}$ | 100                 | 0.0201   | -0.4307           | 0.060          | 94.5%              |
|                               | 250                 | 0.0206   | -0.3767           | 0.057          | 88.9%              |
|                               | 500                 | 0.0208   | -0.3585           | 0.063          | 77.3%              |
| pAUC(0, 0.2) = 0.0726         |                     |          |                   |                |                    |
| $\widehat{pAUC}_{IPW}^{Mis1}$ | 100                 | 0.0698   | -0.2764           | 0.238          | 95.9%              |
|                               | 250                 | 0.0711   | -0.1515           | 0.230          | 96.3%              |
|                               | 500                 | 0.0715   | -0.1093           | 0.247          | 95.5%              |
| $\widehat{pAUC}_{IPW}^{Mis2}$ | 100                 | 0.0622   | -1.0398           | 0.245          | 91.9%              |
|                               | 250                 | 0.0633   | -0.9278           | 0.233          | 82.2%              |

Continued on next page

Table 6 – Continued from previous page

| Method | $n_D = n_{\bar{D}}$ | Estimate | Bias $\times 100$ | Var $\times N$ | Coverage of 95% CI |
|--------|---------------------|----------|-------------------|----------------|--------------------|
|        | 500                 | 0.0636   | -0.8955           | 0.257          | 65.2%              |

**Table 7:** Estimate, bias, variance, and coverage of 95% confidence interval (CI) of  $ROC(t)$ ,  $AUC$  and  $pAUC(t_0, t_1)$  estimators using the IPW method with the estimated sampling probabilities  $\hat{p}^{Mis1}$  and  $\hat{p}^{Mis2}$ , for scenario (2) with the discrete stratum variable  $V_2$ ,  $\rho_{XV^*} = 0.8$ ,  $\rho_{XW} = 0.5$ , and  $\rho_{WV^*} = 0.1$  in finite-population stratified sampling.

| Method                        | $n_D = n_{\bar{D}}$ | Estimate | Bias $\times 100$ | Var $\times N$ | Coverage of 95% CI |
|-------------------------------|---------------------|----------|-------------------|----------------|--------------------|
| $ROC(0.1) = 0.3891$           |                     |          |                   |                |                    |
| $\widehat{ROC}_{IPW}^{Mis1}$  | 100                 | 0.3620   | -2.7139           | 8.321          | 96.2%              |
|                               | 250                 | 0.3604   | -2.8792           | 8.384          | 92.6%              |
|                               | 500                 | 0.3601   | -2.9040           | 8.473          | 86.7%              |
| $\widehat{ROC}_{IPW}^{Mis2}$  | 100                 | 0.3415   | -4.7685           | 9.325          | 97.0%              |
|                               | 250                 | 0.3392   | -4.9963           | 9.357          | 88.2%              |
|                               | 500                 | 0.3392   | -4.9971           | 9.448          | 73.7%              |
| $ROC(0.2) = 0.5629$           |                     |          |                   |                |                    |
| $\widehat{ROC}_{IPW}^{Mis1}$  | 100                 | 0.5340   | -2.8896           | 7.187          | 93.2%              |
|                               | 250                 | 0.5334   | -2.9477           | 6.920          | 88.9%              |
|                               | 500                 | 0.5333   | -2.9578           | 7.291          | 80.3%              |
| $\widehat{ROC}_{IPW}^{Mis2}$  | 100                 | 0.5100   | -5.2968           | 8.442          | 92.6%              |
|                               | 250                 | 0.5089   | -5.4004           | 8.481          | 81.6%              |
|                               | 500                 | 0.5087   | -5.4241           | 8.504          | 62.7%              |
| $AUC = 0.7602$                |                     |          |                   |                |                    |
| $\widehat{AUC}_{IPW}^{Mis1}$  | 100                 | 0.7531   | -0.7148           | 1.020          | 90.6%              |
|                               | 250                 | 0.7532   | -0.7091           | 0.998          | 89.3%              |
|                               | 500                 | 0.7531   | -0.7161           | 1.054          | 85.0%              |
| $\widehat{AUC}_{IPW}^{Mis2}$  | 100                 | 0.7384   | -2.1838           | 1.618          | 91.0%              |
|                               | 250                 | 0.7385   | -2.1738           | 1.648          | 82.3%              |
|                               | 500                 | 0.7385   | -2.1709           | 1.704          | 66.2%              |
| $pAUC(0, 0.1) = 0.0244$       |                     |          |                   |                |                    |
| $\widehat{pAUC}_{IPW}^{Mis1}$ | 100                 | 0.0212   | -0.3140           | 0.049          | 96.4%              |
|                               | 250                 | 0.0217   | -0.2617           | 0.050          | 93.0%              |
|                               | 500                 | 0.0219   | -0.2412           | 0.052          | 87.7%              |
| $\widehat{pAUC}_{IPW}^{Mis2}$ | 100                 | 0.0197   | -0.4663           | 0.053          | 94.7%              |

Continued on next page



Table 7 – Continued from previous page

| Method                        | $n_D = n_{\bar{D}}$ | Estimate | Bias $\times 100$ | Var $\times N$ | Coverage of 95% CI |
|-------------------------------|---------------------|----------|-------------------|----------------|--------------------|
|                               | 250                 | 0.0202   | -0.4143           | 0.055          | 87.4%              |
|                               | 500                 | 0.0205   | -0.3905           | 0.057          | 74.5%              |
| $pAUC(0, 0.2) = 0.0726$       |                     |          |                   |                |                    |
| $\widehat{pAUC}_{IPW}^{Mis1}$ | 100                 | 0.0654   | -0.7199           | 0.181          | 95.1%              |
|                               | 250                 | 0.0664   | -0.6201           | 0.180          | 90.8%              |
|                               | 500                 | 0.0668   | -0.5820           | 0.188          | 82.0%              |
| $\widehat{pAUC}_{IPW}^{Mis2}$ | 100                 | 0.0617   | -1.0927           | 0.214          | 93.4%              |
|                               | 250                 | 0.0625   | -1.0068           | 0.217          | 81.5%              |
|                               | 500                 | 0.0629   | -0.9657           | 0.221          | 61.0%              |
